# Supplementary material
Source: Springer Nature journal article supplement (https://www.springermedizin.de/resource/supplementary/13075_2009_2788_MOESM1_ESM.pdf/9692884)
Supplement: MOESM1 [file 9692884]

**Patients with AS enrolled in RHAPSODY (N = 1,250)**

(211 sites in 15 European countries)

**Patients with  
no enthesitis  
+ no peripheral arthritis  
(n = 457)**

**Patients with  
enthesitis  
(n = 686)\***

**Patients with  
peripheral arthritis  
(n = 281)**

**Patients with  
enthesitis  
+ no peripheral arthritis  
(n = 512)**

**Patients with  
enthesitis  
+ peripheral arthritis  
(n = 174)**

**Patients with  
peripheral arthritis  
+ no enthesitis  
(n = 107)**
